# Supplementary material for: The Peroxidase-like Nanocomposites as Hydrogen Peroxide-Sensitive Elements in Cholesterol Oxidase-Based Biosensors for Cholesterol Assay
Source: MDPI journal article supplement (doi:10.3390/jfb14060315), 2023-06-07
Supplement: s1 [file s1]

Article

# The Peroxidase-like Nanocomposites as Hydrogen Peroxide-Sensitive Elements in Cholesterol Oxidase-Based Biosensors for Cholesterol Assay

Olha Demkiv <sup>1,2</sup>, Wojciech Nogala <sup>3</sup>, Nataliya Stasyuk <sup>1</sup>, Nadiya Grynchyshyn <sup>2</sup>, Bohdan Vus <sup>4</sup>  
and Mykhailo Gonchar <sup>1,\*</sup>

<sup>1</sup> Institute of Cell Biology, National Academy of Sciences of Ukraine, 79005 Lviv, Ukraine; olgademkiv81@gmail.com (O.D.); stasuk\_natalia@ukr.net (N.S.)

<sup>2</sup> Faculty of Veterinary Hygiene, Ecology and Law, Stepan Gzhytskyi National University of Veterinary Medicine and Biotechnologies, 79000 Lviv, Ukraine; ngrynchyshyn@ukr.net

<sup>3</sup> Institute of Physical Chemistry, Polish Academy of Sciences, 01-224 Warsaw, Poland; wnogala@ichf.edu.pl

<sup>4</sup> Department of Electronics and Information Technology, Lviv Polytechnic National University, 79000 Lviv, Ukraine; bogdan.vus@googlegmail.com

\* Correspondence: mykhailo1952@gmail.com; Tel.: +380-322612144

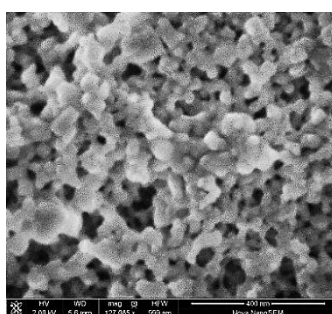

(a)

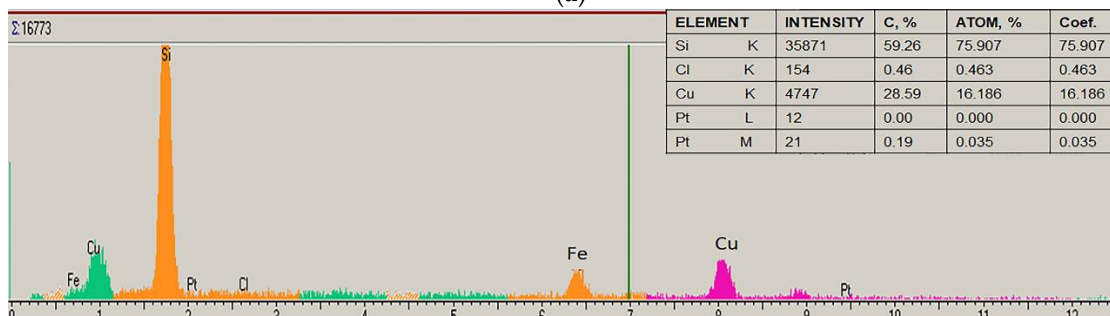

(b)

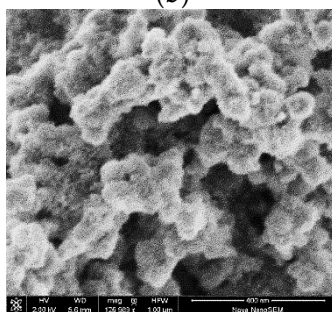

(c)

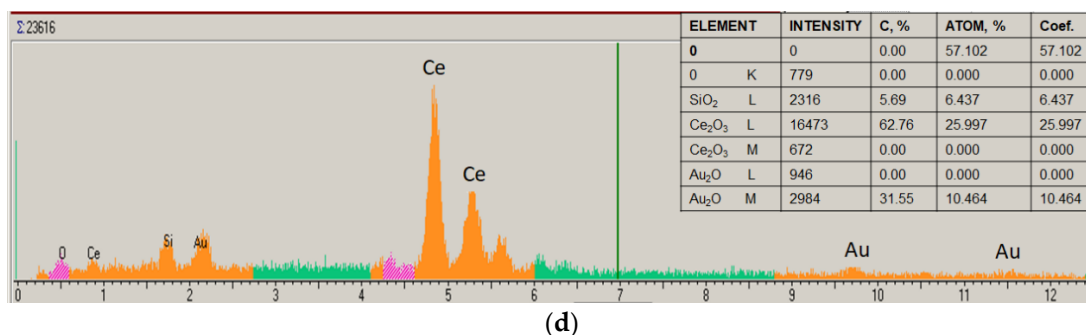

**Figure S1.** Morphological characteristics of the synthesized NZs nCuFe (a,b) and nCeAu (c,d): SEM images (a,c) and XRM data (b,d).

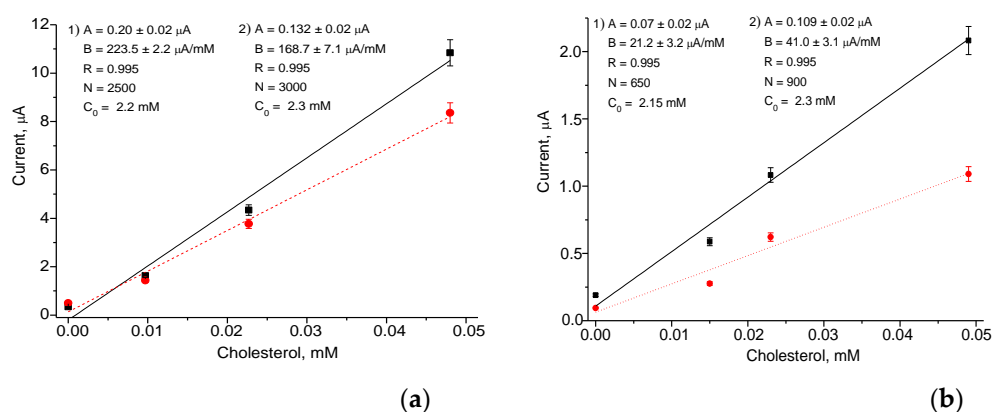

**Figure S2.** Graphical standard addition method for CHOL assay in the human serum by using sensors ChOx/nCuFe/nPt/GCE (a) and ChOx/nCuFe/GCE (b).

**Table S1.** HRP-like activities in solution of the synthesized NZs.

| N | NZs   | Specific Activity, U/mg |
|---|-------|-------------------------|
| 1 | AuHCF | $1.86 \pm 0.10$         |
| 2 | CuFe  | $1.27 \pm 0.06$         |
| 3 | CeAu  | $0.80 \pm 0.04$         |
| 4 | CoHCF | $0.42 \pm 0.02$         |
| 5 | AgCu  | $0.65 \pm 0.03$         |
| 6 | CuPt  | $0.24 \pm 0.01$         |

**Table S2.** Analytical characteristics of bionanosensors of architecture ChOx/NZ/GCE (electrode square of  $7.06 \text{ mm}^2$ ).

| Architecture of the Bioelectrode | $I_{\text{max}}$ , nA | Linear Range, up to, mM | $K_M^{\text{app}}$ , mM | Sensitivity, $A \cdot M^{-1} \cdot m^{-2}$ |
|----------------------------------|-----------------------|-------------------------|-------------------------|--------------------------------------------|
| GlOx/nCeAu/GCE                   | 33                    | 0.05                    | 1.1                     | $21 \pm 0.8$                               |
| GlOx/nAuHCF/GCE                  | 63                    | 0.16                    | 0.30                    | $30 \pm 1.0$                               |
| GlOx/nCuFe/GCE                   | 321                   | 0.1                     | 0.85                    | $331 \pm 4.2$                              |
| GlOx/HRP/GCE                     | 49                    | 0.12                    | 1.60                    | $49 \pm 2.0$                               |
